# Supplementary material for: Properties evaluation of silorane, low-shrinkage, non-flowable and flowable resin-based composites in dentistry
Source: PubMed Central journal article supplement (PMC4465949; doi:10.7717/peerj.864), 2015-06-09
Supplement: peerj-03-864-s001.pdf [file peerj-03-864-s001.pdf]

Material\$ into Material

| Old Value       | New Value | Value Label     |
|-----------------|-----------|-----------------|
| 1- Surefil flow | 1         | 1- Surefil flow |
| 2- Tetric flow  | 2         | 2- Tetric flow  |
| 3- Filtec flow  | 3         | 3- Filtec flow  |
| 4- Esthetic X   | 4         | 4- Esthetic X   |
| 5- TETRIC       | 5         | 5- TETRIC       |
| 6- Filtec Z 350 | 6         | 6- Filtec Z 350 |
| 7- Filtec P 90  | 7         | 7- Filtec P 90  |

# Oneway

## Descriptives

|               |                 | N  | Mean    | Std. Deviation | Std. Error |
|---------------|-----------------|----|---------|----------------|------------|
| Cont_stress   | 1- Surefil flow | 10 | 2,9060  | ,03950         | ,01249     |
|               | 2- Tetric flow  | 10 | 4,2170  | ,07602         | ,02404     |
|               | 3- Filtec flow  | 10 | 4,1120  | ,05329         | ,01685     |
|               | 4- Esthetic X   | 10 | 2,2560  | ,09489         | ,03001     |
|               | 5- TETRIC       | 10 | 2,0310  | ,13025         | ,04119     |
|               | 6- Filtec Z 350 | 10 | 2,1340  | ,07471         | ,02363     |
|               | 7- Filtec P 90  | 10 | 1,0150  | ,11549         | ,03652     |
|               | Total           | 70 | 2,6673  | 1,08906        | ,13017     |
| Dureza_Bottom | 1- Surefil flow | 10 | 64,8100 | ,04055         | ,01282     |
|               | 2- Tetric flow  | 10 | 41,8580 | ,54526         | ,17243     |
|               | 3- Filtec flow  | 10 | 45,1240 | ,15508         | ,04904     |
|               | 4- Esthetic X   | 10 | 61,3210 | ,53494         | ,16916     |
|               | 5- TETRIC       | 10 | 52,0290 | ,43514         | ,13760     |
|               | 6- Filtec Z 350 | 10 | 63,2820 | ,81122         | ,25653     |
|               | 7- Filtec P 90  | 10 | 62,3620 | ,69315         | ,21919     |
|               | Total           | 70 | 55,8266 | 8,80561        | 1,05247    |
| Dureza_Top    | 1- Surefil flow | 10 | 72,725  | 1,2387         | ,3917      |
|               | 2- Tetric flow  | 10 | 55,599  | ,0223          | ,0071      |
|               | 3- Filtec flow  | 10 | 53,712  | 1,3180         | ,4168      |
|               | 4- Esthetic X   | 10 | 77,422  | 1,2494         | ,3951      |
|               | 5- TETRIC       | 10 | 64,130  | 1,1496         | ,3635      |
|               | 6- Filtec Z 350 | 10 | 78,664  | ,6778          | ,2143      |
|               | 7- Filtec P 90  | 10 | 73,704  | ,6073          | ,1920      |
|               | Total           | 70 | 67,994  | 9,6049         | 1,1480     |
| Prof_Polim    | 1- Surefil flow | 10 | 3,0710  | ,04533         | ,01433     |
|               | 2- Tetric flow  | 10 | 2,8930  | ,07025         | ,02221     |
|               | 3- Filtec flow  | 10 | 2,8370  | ,13458         | ,04256     |
|               | 4- Esthetic X   | 10 | 2,6120  | ,09589         | ,03032     |
|               | 5- TETRIC       | 10 | 2,5440  | ,22814         | ,07214     |
|               | 6- Filtec Z 350 | 10 | 2,5670  | ,13208         | ,04177     |
|               | 7- Filtec P 90  | 10 | 2,6790  | ,05820         | ,01841     |
|               | Total           | 70 | 2,7433  | ,21777         | ,02603     |
| Red_Cont_com  | 1- Surefil flow | 0  | .       | .              | .          |
|               | 2- Tetric flow  | 0  | .       | .              | .          |
|               | 3- Filtec flow  | 0  | .       | .              | .          |
|               | 4- Esthetic X   | 10 | 6,2870  | ,12193         | ,03856     |
|               | 5- TETRIC       | 10 | 5,8940  | ,23726         | ,07503     |
|               | 6- Filtec Z 350 | 10 | 5,7400  | ,35978         | ,11377     |
|               | 7- Filtec P 90  | 10 | 3,8060  | ,24254         | ,07670     |
|               | Total           | 40 | 5,4318  | 1,00214        | ,15845     |
| Red_Cont_sem  | 1- Surefil flow | 10 | 5,0590  | ,36892         | ,11666     |
|               | 2- Tetric flow  | 0  | .       | .              | .          |
|               | 3- Filtec flow  | 0  | .       | .              | .          |
|               | 4- Esthetic X   | 10 | 8,5210  | ,39051         | ,12349     |
|               | 5- TETRIC       | 10 | 8,4950  | ,49437         | ,15633     |
|               | 6- Filtec Z 350 | 10 | 8,4070  | ,46636         | ,14748     |
|               | 7- Filtec P 90  | 10 | 4,8730  | ,37665         | ,11911     |
|               | Total           | 50 | 7,0710  | 1,78415        | ,25232     |

### Descriptives

|               |                 | 95% Confidence Interval for Mean |             | Minimum | Maximum |
|---------------|-----------------|----------------------------------|-------------|---------|---------|
|               |                 | Lower Bound                      | Upper Bound |         |         |
| Cont_stress   | 1- Surefil flow | 2,8777                           | 2,9343      | 2,82    | 2,97    |
|               | 2- Tetric flow  | 4,1626                           | 4,2714      | 4,07    | 4,33    |
|               | 3- Filtec flow  | 4,0739                           | 4,1501      | 4,01    | 4,19    |
|               | 4- Esthetic X   | 2,1881                           | 2,3239      | 2,13    | 2,41    |
|               | 5- TETRIC       | 1,9378                           | 2,1242      | 1,82    | 2,30    |
|               | 6- Filtec Z 350 | 2,0806                           | 2,1874      | 1,99    | 2,25    |
|               | 7- Filtec P 90  | ,9324                            | 1,0976      | ,86     | 1,20    |
|               | Total           | 2,4076                           | 2,9270      | ,86     | 4,33    |
| Dureza_Bottom | 1- Surefil flow | 64,7810                          | 64,8390     | 64,73   | 64,87   |
|               | 2- Tetric flow  | 41,4679                          | 42,2481     | 40,87   | 42,93   |
|               | 3- Filtec flow  | 45,0131                          | 45,2349     | 44,86   | 45,34   |
|               | 4- Esthetic X   | 60,9383                          | 61,7037     | 60,38   | 62,22   |
|               | 5- TETRIC       | 51,7177                          | 52,3403     | 51,16   | 52,84   |
|               | 6- Filtec Z 350 | 62,7017                          | 63,8623     | 61,53   | 64,87   |
|               | 7- Filtec P 90  | 61,8661                          | 62,8579     | 61,07   | 63,73   |
|               | Total           | 53,7269                          | 57,9262     | 40,87   | 64,87   |
| Dureza_Top    | 1- Surefil flow | 71,839                           | 73,611      | 70,5    | 74,1    |
|               | 2- Tetric flow  | 55,583                           | 55,615      | 55,6    | 55,6    |
|               | 3- Filtec flow  | 52,769                           | 54,655      | 50,9    | 55,1    |
|               | 4- Esthetic X   | 76,528                           | 78,316      | 76,2    | 79,0    |
|               | 5- TETRIC       | 63,308                           | 64,952      | 61,9    | 65,9    |
|               | 6- Filtec Z 350 | 78,179                           | 79,149      | 77,7    | 80,1    |
|               | 7- Filtec P 90  | 73,270                           | 74,138      | 72,2    | 74,6    |
|               | Total           | 65,704                           | 70,284      | 50,9    | 80,1    |
| Prof_Polim    | 1- Surefil flow | 3,0386                           | 3,1034      | 2,99    | 3,14    |
|               | 2- Tetric flow  | 2,8427                           | 2,9433      | 2,79    | 2,99    |
|               | 3- Filtec flow  | 2,7407                           | 2,9333      | 2,59    | 3,03    |
|               | 4- Esthetic X   | 2,5434                           | 2,6806      | 2,37    | 2,73    |
|               | 5- TETRIC       | 2,3808                           | 2,7072      | 2,20    | 2,86    |
|               | 6- Filtec Z 350 | 2,4725                           | 2,6615      | 2,35    | 2,77    |
|               | 7- Filtec P 90  | 2,6374                           | 2,7206      | 2,59    | 2,77    |
|               | Total           | 2,6914                           | 2,7952      | 2,20    | 3,14    |
| Red_Cont_com  | 1- Surefil flow | .                                | .           | .       | .       |
|               | 2- Tetric flow  | .                                | .           | .       | .       |
|               | 3- Filtec flow  | .                                | .           | .       | .       |
|               | 4- Esthetic X   | 6,1998                           | 6,3742      | 6,01    | 6,47    |
|               | 5- TETRIC       | 5,7243                           | 6,0637      | 5,60    | 6,28    |
|               | 6- Filtec Z 350 | 5,4826                           | 5,9974      | 5,27    | 6,41    |
|               | 7- Filtec P 90  | 3,6325                           | 3,9795      | 3,32    | 4,32    |
|               | Total           | 5,1113                           | 5,7522      | 3,32    | 6,47    |
| Red_Cont_sem  | 1- Surefil flow | 4,7951                           | 5,3229      | 4,55    | 5,54    |
|               | 2- Tetric flow  | .                                | .           | .       | .       |
|               | 3- Filtec flow  | .                                | .           | .       | .       |
|               | 4- Esthetic X   | 8,2416                           | 8,8004      | 7,84    | 9,38    |
|               | 5- TETRIC       | 8,1413                           | 8,8487      | 7,70    | 9,38    |
|               | 6- Filtec Z 350 | 8,0734                           | 8,7406      | 7,48    | 9,16    |
|               | 7- Filtec P 90  | 4,6036                           | 5,1424      | 4,14    | 5,66    |
|               | Total           | 6,5640                           | 7,5780      | 4,14    | 9,38    |

**ANOVA**

|               |                | Sum of Squares | df | Mean Square | F        | Sig. |
|---------------|----------------|----------------|----|-------------|----------|------|
| Cont_stress   | Between Groups | 81,343         | 6  | 13,557      | 1723,255 | ,000 |
|               | Within Groups  | ,496           | 63 | ,008        |          |      |
|               | Total          | 81,838         | 69 |             |          |      |
| Dureza_Bottom | Between Groups | 5332,735       | 6  | 888,789     | 3211,846 | ,000 |
|               | Within Groups  | 17,433         | 63 | ,277        |          |      |
|               | Total          | 5350,169       | 69 |             |          |      |
| Dureza_Top    | Between Groups | 6302,646       | 6  | 1050,441    | 1053,063 | ,000 |
|               | Within Groups  | 62,843         | 63 | ,998        |          |      |
|               | Total          | 6365,489       | 69 |             |          |      |
| Prof_Polim    | Between Groups | 2,308          | 6  | ,385        | 25,118   | ,000 |
|               | Within Groups  | ,965           | 63 | ,015        |          |      |
|               | Total          | 3,272          | 69 |             |          |      |
| Red_Cont_com  | Between Groups | 36,832         | 3  | 12,277      | 189,296  | ,000 |
|               | Within Groups  | 2,335          | 36 | ,065        |          |      |
|               | Total          | 39,167         | 39 |             |          |      |
| Red_Cont_sem  | Between Groups | 147,945        | 4  | 36,986      | 207,238  | ,000 |
|               | Within Groups  | 8,031          | 45 | ,178        |          |      |
|               | Total          | 155,976        | 49 |             |          |      |

**Post Hoc Tests**

**Homogeneous Subsets**

Cont\_stress

| Material                          | N               | Subset for alpha = .05 |        |        |        |        |
|-----------------------------------|-----------------|------------------------|--------|--------|--------|--------|
|                                   |                 | 1                      | 2      | 3      | 4      |        |
| Student-Newman-Keuls <sup>a</sup> | 7- Filtec P 90  | 10                     | 1,0150 |        |        |        |
|                                   | 5- TETRIC       | 10                     |        | 2,0310 |        |        |
|                                   | 6- Filtec Z 350 | 10                     |        |        | 2,1340 |        |
|                                   | 4- Esthetic X   | 10                     |        |        |        | 2,2560 |
|                                   | 1- Surefil flow | 10                     |        |        |        |        |
|                                   | 3- Filtec flow  | 10                     |        |        |        |        |
|                                   | 2- Tetric flow  | 10                     |        |        |        |        |
|                                   | Sig.            |                        | 1,000  | 1,000  | 1,000  | 1,000  |
| Tukey HSD <sup>a</sup>            | 7- Filtec P 90  | 10                     | 1,0150 |        |        |        |
|                                   | 5- TETRIC       | 10                     |        | 2,0310 |        |        |
|                                   | 6- Filtec Z 350 | 10                     |        | 2,1340 |        |        |
|                                   | 4- Esthetic X   | 10                     |        |        | 2,2560 |        |
|                                   | 1- Surefil flow | 10                     |        |        |        | 2,9060 |
|                                   | 3- Filtec flow  | 10                     |        |        |        |        |
|                                   | 2- Tetric flow  | 10                     |        |        |        |        |
|                                   | Sig.            |                        | 1,000  | ,145   | 1,000  | 1,000  |
| Tukey B <sup>a</sup>              | 7- Filtec P 90  | 10                     | 1,0150 |        |        |        |
|                                   | 5- TETRIC       | 10                     |        | 2,0310 |        |        |
|                                   | 6- Filtec Z 350 | 10                     |        |        | 2,1340 |        |
|                                   | 4- Esthetic X   | 10                     |        |        |        | 2,2560 |
|                                   | 1- Surefil flow | 10                     |        |        |        |        |
|                                   | 3- Filtec flow  | 10                     |        |        |        |        |
|                                   | 2- Tetric flow  | 10                     |        |        |        |        |
| Duncan <sup>a</sup>               | 7- Filtec P 90  | 10                     | 1,0150 |        |        |        |
|                                   | 5- TETRIC       | 10                     |        | 2,0310 |        |        |
|                                   | 6- Filtec Z 350 | 10                     |        |        | 2,1340 |        |
|                                   | 4- Esthetic X   | 10                     |        |        |        | 2,2560 |
|                                   | 1- Surefil flow | 10                     |        |        |        |        |
|                                   | 3- Filtec flow  | 10                     |        |        |        |        |
|                                   | 2- Tetric flow  | 10                     |        |        |        |        |
|                                   | Sig.            |                        | 1,000  | 1,000  | 1,000  | 1,000  |
| Scheffe <sup>a</sup>              | 7- Filtec P 90  | 10                     | 1,0150 |        |        |        |
|                                   | 5- TETRIC       | 10                     |        | 2,0310 |        |        |
|                                   | 6- Filtec Z 350 | 10                     |        | 2,1340 | 2,1340 |        |
|                                   | 4- Esthetic X   | 10                     |        |        | 2,2560 |        |
|                                   | 1- Surefil flow | 10                     |        |        |        | 2,9060 |
|                                   | 3- Filtec flow  | 10                     |        |        |        |        |
|                                   | 2- Tetric flow  | 10                     |        |        |        |        |
|                                   | Sig.            |                        | 1,000  | ,359   | ,169   | 1,000  |
| Gabriel <sup>a</sup>              | 7- Filtec P 90  | 10                     | 1,0150 |        |        |        |
|                                   | 5- TETRIC       | 10                     |        | 2,0310 |        |        |
|                                   | 6- Filtec Z 350 | 10                     |        | 2,1340 | 2,1340 |        |
|                                   | 4- Esthetic X   | 10                     |        |        | 2,2560 |        |
|                                   | 1- Surefil flow | 10                     |        |        |        | 2,9060 |
|                                   | 3- Filtec flow  | 10                     |        |        |        |        |
|                                   | 2- Tetric flow  | 10                     |        |        |        |        |
|                                   | Sig.            |                        | 1,000  | ,209   | ,062   | 1,000  |

Means for groups in homogeneous subsets are displayed.

Cont\_stress

|                                 |                 | N  | Subset for alpha = .05 |        |        |        |
|---------------------------------|-----------------|----|------------------------|--------|--------|--------|
| Material                        |                 |    | 1                      | 2      | 3      | 4      |
| Ryan-Einot-Gabriel-Welsch F     | 7- Filtec P 90  | 10 | 1,0150                 |        |        |        |
|                                 | 5- TETRIC       | 10 |                        | 2,0310 |        |        |
|                                 | 6- Filtec Z 350 | 10 |                        |        | 2,1340 |        |
|                                 | 4- Esthetic X   | 10 |                        |        |        | 2,2560 |
|                                 | 1- Surefil flow | 10 |                        |        |        |        |
|                                 | 3- Filtec flow  | 10 |                        |        |        |        |
|                                 | 2- Tetric flow  | 10 |                        |        |        |        |
|                                 | Sig.            |    | 1,000                  | 1,000  | 1,000  | 1,000  |
| Ryan-Einot-Gabriel-Welsch Range | 7- Filtec P 90  | 10 | 1,0150                 |        |        |        |
|                                 | 5- TETRIC       | 10 |                        | 2,0310 |        |        |
|                                 | 6- Filtec Z 350 | 10 |                        |        | 2,1340 |        |
|                                 | 4- Esthetic X   | 10 |                        |        |        | 2,2560 |
|                                 | 1- Surefil flow | 10 |                        |        |        |        |
|                                 | 3- Filtec flow  | 10 |                        |        |        |        |
|                                 | 2- Tetric flow  | 10 |                        |        |        |        |
|                                 | Sig.            |    | 1,000                  | 1,000  | 1,000  | 1,000  |
| Hochberg <sup>a</sup>           | 7- Filtec P 90  | 10 | 1,0150                 |        |        |        |
|                                 | 5- TETRIC       | 10 |                        | 2,0310 |        |        |
|                                 | 6- Filtec Z 350 | 10 |                        | 2,1340 |        |        |
|                                 | 4- Esthetic X   | 10 |                        |        | 2,1340 |        |
|                                 | 1- Surefil flow | 10 |                        |        | 2,2560 |        |
|                                 | 3- Filtec flow  | 10 |                        |        |        | 2,9060 |
|                                 | 2- Tetric flow  | 10 |                        |        |        |        |
|                                 | Sig.            |    | 1,000                  | ,209   | ,062   | 1,000  |

Means for groups in homogeneous subsets are displayed.

**Cont\_stress**

|                                   |                                                                                                                                | Subset for alpha = .05                   |                                     |                                         |
|-----------------------------------|--------------------------------------------------------------------------------------------------------------------------------|------------------------------------------|-------------------------------------|-----------------------------------------|
|                                   |                                                                                                                                | 5                                        | 6                                   | 7                                       |
| Student-Newman-Keuls <sup>a</sup> | 7- Filtec P 90<br>5- TETRIC<br>6- Filtec Z 350<br>4- Esthetic X<br>1- Surefil flow<br>3- Filtec flow<br>2- Tetric flow<br>Sig. | 2,9060<br><br><br><br><br><br>1,000      | <br><br><br><br>4,1120<br><br>1,000 | <br><br><br><br><br><br>4,2170<br>1,000 |
| Tukey HSD <sup>a</sup>            | 7- Filtec P 90<br>5- TETRIC<br>6- Filtec Z 350<br>4- Esthetic X<br>1- Surefil flow<br>3- Filtec flow<br>2- Tetric flow<br>Sig. | <br><br><br><br>4,1120<br>4,2170<br>,130 |                                     |                                         |
| Tukey B <sup>a</sup>              | 7- Filtec P 90<br>5- TETRIC<br>6- Filtec Z 350<br>4- Esthetic X<br>1- Surefil flow<br>3- Filtec flow<br>2- Tetric flow         | 2,9060                                   | 4,1120                              | 4,2170                                  |
| Duncan <sup>a</sup>               | 7- Filtec P 90<br>5- TETRIC<br>6- Filtec Z 350<br>4- Esthetic X<br>1- Surefil flow<br>3- Filtec flow<br>2- Tetric flow<br>Sig. | 2,9060<br><br><br><br><br><br>1,000      | <br><br><br><br>4,1120<br><br>1,000 | <br><br><br><br><br><br>4,2170<br>1,000 |
| Scheffe <sup>a</sup>              | 7- Filtec P 90<br>5- TETRIC<br>6- Filtec Z 350<br>4- Esthetic X<br>1- Surefil flow<br>3- Filtec flow<br>2- Tetric flow<br>Sig. | <br><br><br><br>4,1120<br>4,2170<br>,335 |                                     |                                         |
| Gabriel <sup>a</sup>              | 7- Filtec P 90<br>5- TETRIC<br>6- Filtec Z 350<br>4- Esthetic X<br>1- Surefil flow<br>3- Filtec flow<br>2- Tetric flow<br>Sig. | <br><br><br><br>4,1120<br>4,2170<br>,186 |                                     |                                         |

Means for groups in homogeneous subsets are displayed.

**Cont\_stress**

|                                 |                                                                                                                                | Subset for alpha = .05                   |                                     |                                         |
|---------------------------------|--------------------------------------------------------------------------------------------------------------------------------|------------------------------------------|-------------------------------------|-----------------------------------------|
|                                 |                                                                                                                                | 5                                        | 6                                   | 7                                       |
| Ryan-Einot-Gabriel-Welsch F     | 7- Filtec P 90<br>5- TETRIC<br>6- Filtec Z 350<br>4- Esthetic X<br>1- Surefil flow<br>3- Filtec flow<br>2- Tetric flow<br>Sig. | 2,9060<br><br><br><br><br><br>1,000      | <br><br><br><br>4,1120<br><br>1,000 | <br><br><br><br><br><br>4,2170<br>1,000 |
| Ryan-Einot-Gabriel-Welsch Range | 7- Filtec P 90<br>5- TETRIC<br>6- Filtec Z 350<br>4- Esthetic X<br>1- Surefil flow<br>3- Filtec flow<br>2- Tetric flow<br>Sig. | 2,9060<br><br><br><br><br><br>1,000      | <br><br><br><br>4,1120<br><br>1,000 | <br><br><br><br><br><br>4,2170<br>1,000 |
| Hochberg <sup>a</sup>           | 7- Filtec P 90<br>5- TETRIC<br>6- Filtec Z 350<br>4- Esthetic X<br>1- Surefil flow<br>3- Filtec flow<br>2- Tetric flow<br>Sig. | <br><br><br><br>4,1120<br>4,2170<br>,186 |                                     |                                         |

Means for groups in homogeneous subsets are displayed.

a. Uses Harmonic Mean Sample Size = 10,000.

b. Critical values are not monotonic for these data. Substitutions have been made to ensure monotonicity. Type I error is therefore smaller.



Durezza\_Bottom

| Material                          | N               | Subset for alpha = .05 |         |         |         |         |
|-----------------------------------|-----------------|------------------------|---------|---------|---------|---------|
|                                   |                 | 1                      | 2       | 3       | 4       |         |
| Student-Newman-Keuls <sup>a</sup> | 2- Tetric flow  | 10                     | 41,8580 |         |         |         |
|                                   | 3- Filtec flow  | 10                     |         | 45,1240 |         |         |
|                                   | 5- TETRIC       | 10                     |         |         | 52,0290 |         |
|                                   | 4- Esthetic X   | 10                     |         |         |         | 61,3210 |
|                                   | 7- Filtec P 90  | 10                     |         |         |         |         |
|                                   | 6- Filtec Z 350 | 10                     |         |         |         |         |
|                                   | 1- Surefil flow | 10                     |         |         |         |         |
|                                   | Sig.            |                        | 1,000   | 1,000   | 1,000   | 1,000   |
| Tukey HSD <sup>a</sup>            | 2- Tetric flow  | 10                     | 41,8580 |         |         |         |
|                                   | 3- Filtec flow  | 10                     |         | 45,1240 |         |         |
|                                   | 5- TETRIC       | 10                     |         |         | 52,0290 |         |
|                                   | 4- Esthetic X   | 10                     |         |         |         | 61,3210 |
|                                   | 7- Filtec P 90  | 10                     |         |         |         |         |
|                                   | 6- Filtec Z 350 | 10                     |         |         |         |         |
|                                   | 1- Surefil flow | 10                     |         |         |         |         |
|                                   | Sig.            |                        | 1,000   | 1,000   | 1,000   | 1,000   |
| Tukey B <sup>a</sup>              | 2- Tetric flow  | 10                     | 41,8580 |         |         |         |
|                                   | 3- Filtec flow  | 10                     |         | 45,1240 |         |         |
|                                   | 5- TETRIC       | 10                     |         |         | 52,0290 |         |
|                                   | 4- Esthetic X   | 10                     |         |         |         | 61,3210 |
|                                   | 7- Filtec P 90  | 10                     |         |         |         |         |
|                                   | 6- Filtec Z 350 | 10                     |         |         |         |         |
|                                   | 1- Surefil flow | 10                     |         |         |         |         |
|                                   | Sig.            |                        | 1,000   | 1,000   | 1,000   | 1,000   |
| Duncan <sup>a</sup>               | 2- Tetric flow  | 10                     | 41,8580 |         |         |         |
|                                   | 3- Filtec flow  | 10                     |         | 45,1240 |         |         |
|                                   | 5- TETRIC       | 10                     |         |         | 52,0290 |         |
|                                   | 4- Esthetic X   | 10                     |         |         |         | 61,3210 |
|                                   | 7- Filtec P 90  | 10                     |         |         |         |         |
|                                   | 6- Filtec Z 350 | 10                     |         |         |         |         |
|                                   | 1- Surefil flow | 10                     |         |         |         |         |
|                                   | Sig.            |                        | 1,000   | 1,000   | 1,000   | 1,000   |
| Scheffe <sup>a</sup>              | 2- Tetric flow  | 10                     | 41,8580 |         |         |         |
|                                   | 3- Filtec flow  | 10                     |         | 45,1240 |         |         |
|                                   | 5- TETRIC       | 10                     |         |         | 52,0290 |         |
|                                   | 4- Esthetic X   | 10                     |         |         |         | 61,3210 |
|                                   | 7- Filtec P 90  | 10                     |         |         |         |         |
|                                   | 6- Filtec Z 350 | 10                     |         |         |         |         |
|                                   | 1- Surefil flow | 10                     |         |         |         |         |
|                                   | Sig.            |                        | 1,000   | 1,000   | 1,000   | 1,000   |
| Gabriel <sup>a</sup>              | 2- Tetric flow  | 10                     | 41,8580 |         |         |         |
|                                   | 3- Filtec flow  | 10                     |         | 45,1240 |         |         |
|                                   | 5- TETRIC       | 10                     |         |         | 52,0290 |         |
|                                   | 4- Esthetic X   | 10                     |         |         |         | 61,3210 |
|                                   | 7- Filtec P 90  | 10                     |         |         |         |         |
|                                   | 6- Filtec Z 350 | 10                     |         |         |         |         |
|                                   | 1- Surefil flow | 10                     |         |         |         |         |
|                                   | Sig.            |                        | 1,000   | 1,000   | 1,000   | 1,000   |

Means for groups in homogeneous subsets are displayed.

Dureza\_Bottom

|                                 |                 | N  | Subset for alpha = .05 |         |         |         |
|---------------------------------|-----------------|----|------------------------|---------|---------|---------|
|                                 |                 |    | 1                      | 2       | 3       | 4       |
| Ryan-Einot-Gabriel-Welsch F     | 2- Tetric flow  | 10 | 41,8580                |         |         |         |
|                                 | 3- Filtec flow  | 10 |                        | 45,1240 |         |         |
|                                 | 5- TETRIC       | 10 |                        |         | 52,0290 |         |
|                                 | 4- Esthetic X   | 10 |                        |         |         | 61,3210 |
|                                 | 7- Filtec P 90  | 10 |                        |         |         |         |
|                                 | 6- Filtec Z 350 | 10 |                        |         |         |         |
|                                 | 1- Surefil flow | 10 |                        |         |         |         |
|                                 | Sig.            |    | 1,000                  | 1,000   | 1,000   | 1,000   |
| Ryan-Einot-Gabriel-Welsch Range | 2- Tetric flow  | 10 | 41,8580                |         |         |         |
|                                 | 3- Filtec flow  | 10 |                        | 45,1240 |         |         |
|                                 | 5- TETRIC       | 10 |                        |         | 52,0290 |         |
|                                 | 4- Esthetic X   | 10 |                        |         |         | 61,3210 |
|                                 | 7- Filtec P 90  | 10 |                        |         |         |         |
|                                 | 6- Filtec Z 350 | 10 |                        |         |         |         |
|                                 | 1- Surefil flow | 10 |                        |         |         |         |
|                                 | Sig.            |    | 1,000                  | 1,000   | 1,000   | 1,000   |
| Hochberg <sup>a</sup>           | 2- Tetric flow  | 10 | 41,8580                |         |         |         |
|                                 | 3- Filtec flow  | 10 |                        | 45,1240 |         |         |
|                                 | 5- TETRIC       | 10 |                        |         | 52,0290 |         |
|                                 | 4- Esthetic X   | 10 |                        |         |         | 61,3210 |
|                                 | 7- Filtec P 90  | 10 |                        |         |         |         |
|                                 | 6- Filtec Z 350 | 10 |                        |         |         |         |
|                                 | 1- Surefil flow | 10 |                        |         |         |         |
|                                 | Sig.            |    | 1,000                  | 1,000   | 1,000   | 1,000   |

Means for groups in homogeneous subsets are displayed.

Durezza\_Bottom

| Material                                                                                                                                                            | Subset for alpha = .05               |                                      |                                          |
|---------------------------------------------------------------------------------------------------------------------------------------------------------------------|--------------------------------------|--------------------------------------|------------------------------------------|
|                                                                                                                                                                     | 5                                    | 6                                    | 7                                        |
| Student-Newman-Keuls <sup>a</sup><br>2- Tetric flow<br>3- Filtec flow<br>5- TETRIC<br>4- Esthetic X<br>7- Filtec P 90<br>6- Filtec Z 350<br>1- Surefil flow<br>Sig. | 62,3620<br><br><br><br><br><br>1,000 | <br><br><br><br>63,2820<br><br>1,000 | <br><br><br><br><br><br>64,8100<br>1,000 |
| Tukey HSD <sup>a</sup><br>2- Tetric flow<br>3- Filtec flow<br>5- TETRIC<br>4- Esthetic X<br>7- Filtec P 90<br>6- Filtec Z 350<br>1- Surefil flow<br>Sig.            | 62,3620<br><br><br><br><br><br>1,000 | <br><br><br><br>63,2820<br><br>1,000 | <br><br><br><br><br><br>64,8100<br>1,000 |
| Tukey B <sup>a</sup><br>2- Tetric flow<br>3- Filtec flow<br>5- TETRIC<br>4- Esthetic X<br>7- Filtec P 90<br>6- Filtec Z 350<br>1- Surefil flow                      | 62,3620                              | 63,2820                              | 64,8100                                  |
| Duncan <sup>a</sup><br>2- Tetric flow<br>3- Filtec flow<br>5- TETRIC<br>4- Esthetic X<br>7- Filtec P 90<br>6- Filtec Z 350<br>1- Surefil flow<br>Sig.               | 62,3620<br><br><br><br><br><br>1,000 | <br><br><br><br>63,2820<br><br>1,000 | <br><br><br><br><br><br>64,8100<br>1,000 |
| Scheffe <sup>a</sup><br>2- Tetric flow<br>3- Filtec flow<br>5- TETRIC<br>4- Esthetic X<br>7- Filtec P 90<br>6- Filtec Z 350<br>1- Surefil flow<br>Sig.              | 62,3620<br><br><br><br><br><br>1,000 | <br><br><br><br>63,2820<br><br>1,000 | <br><br><br><br><br><br>64,8100<br>1,000 |
| Gabriel <sup>a</sup><br>2- Tetric flow<br>3- Filtec flow<br>5- TETRIC<br>4- Esthetic X<br>7- Filtec P 90<br>6- Filtec Z 350<br>1- Surefil flow<br>Sig.              | 62,3620<br><br><br><br><br><br>1,000 | <br><br><br><br>63,2820<br><br>1,000 | <br><br><br><br><br><br>64,8100<br>1,000 |

Means for groups in homogeneous subsets are displayed.

**Dureza\_Bottom**

|                                 |                 | Subset for alpha = .05 |         |         |
|---------------------------------|-----------------|------------------------|---------|---------|
|                                 |                 | 5                      | 6       | 7       |
| Ryan-Einot-Gabriel-Welsch F     | 2- Tetric flow  |                        |         |         |
|                                 | 3- Filtec flow  |                        |         |         |
|                                 | 5- TETRIC       |                        |         |         |
|                                 | 4- Esthetic X   |                        |         |         |
|                                 | 7- Filtec P 90  | 62,3620                |         |         |
|                                 | 6- Filtec Z 350 |                        | 63,2820 |         |
|                                 | 1- Surefil flow |                        |         | 64,8100 |
|                                 | Sig.            | 1,000                  | 1,000   | 1,000   |
| Ryan-Einot-Gabriel-Welsch Range | 2- Tetric flow  |                        |         |         |
|                                 | 3- Filtec flow  |                        |         |         |
|                                 | 5- TETRIC       |                        |         |         |
|                                 | 4- Esthetic X   |                        |         |         |
|                                 | 7- Filtec P 90  | 62,3620                |         |         |
|                                 | 6- Filtec Z 350 |                        | 63,2820 |         |
|                                 | 1- Surefil flow |                        |         | 64,8100 |
|                                 | Sig.            | 1,000                  | 1,000   | 1,000   |
| Hochberg <sup>a</sup>           | 2- Tetric flow  |                        |         |         |
|                                 | 3- Filtec flow  |                        |         |         |
|                                 | 5- TETRIC       |                        |         |         |
|                                 | 4- Esthetic X   |                        |         |         |
|                                 | 7- Filtec P 90  | 62,3620                |         |         |
|                                 | 6- Filtec Z 350 |                        | 63,2820 |         |
|                                 | 1- Surefil flow |                        |         | 64,8100 |
|                                 | Sig.            | 1,000                  | 1,000   | 1,000   |

Means for groups in homogeneous subsets are displayed.

a. Uses Harmonic Mean Sample Size = 10,000.

b. Critical values are not monotonic for these data. Substitutions have been made to ensure monotonicity. Type I error is therefore smaller.

Durezza\_Top

| Material                          | N                                                                                                                              | Subset for alpha = .05                          |                                         |                                         |                                             |                                                      |
|-----------------------------------|--------------------------------------------------------------------------------------------------------------------------------|-------------------------------------------------|-----------------------------------------|-----------------------------------------|---------------------------------------------|------------------------------------------------------|
|                                   |                                                                                                                                | 1                                               | 2                                       | 3                                       | 4                                           |                                                      |
| Student-Newman-Keuls <sup>a</sup> | 3- Filtec flow<br>2- Tetric flow<br>5- TETRIC<br>1- Surefil flow<br>7- Filtec P 90<br>4- Esthetic X<br>6- Filtec Z 350<br>Sig. | 10<br>10<br>10<br>10<br>10<br>10<br>10<br>1,000 | 53,712<br><br><br><br><br><br><br>1,000 | <br>55,599<br><br><br><br><br><br>1,000 | <br><br>64,130<br><br><br><br><br><br>1,000 | <br><br><br>72,725<br><br><br><br><br><br>1,000      |
| Tukey HSD <sup>a</sup>            | 3- Filtec flow<br>2- Tetric flow<br>5- TETRIC<br>1- Surefil flow<br>7- Filtec P 90<br>4- Esthetic X<br>6- Filtec Z 350<br>Sig. | 10<br>10<br>10<br>10<br>10<br>10<br>10<br>1,000 | 53,712<br><br><br><br><br><br><br>1,000 | <br>55,599<br><br><br><br><br><br>1,000 | <br><br>64,130<br><br><br><br><br><br>1,000 | <br><br><br>72,725<br>73,704<br><br><br><br><br>,315 |
| Tukey B <sup>a</sup>              | 3- Filtec flow<br>2- Tetric flow<br>5- TETRIC<br>1- Surefil flow<br>7- Filtec P 90<br>4- Esthetic X<br>6- Filtec Z 350         | 10<br>10<br>10<br>10<br>10<br>10<br>10          | 53,712<br><br><br><br><br><br><br>      | <br>55,599<br><br><br><br><br><br>      | <br><br>64,130<br><br><br><br><br><br>      | <br><br><br>72,725<br>73,704<br><br><br><br><br>     |
| Duncan <sup>a</sup>               | 3- Filtec flow<br>2- Tetric flow<br>5- TETRIC<br>1- Surefil flow<br>7- Filtec P 90<br>4- Esthetic X<br>6- Filtec Z 350<br>Sig. | 10<br>10<br>10<br>10<br>10<br>10<br>10<br>1,000 | 53,712<br><br><br><br><br><br><br>1,000 | <br>55,599<br><br><br><br><br><br>1,000 | <br><br>64,130<br><br><br><br><br><br>1,000 | <br><br><br>72,725<br><br><br><br><br><br>1,000      |
| Scheffe <sup>a</sup>              | 3- Filtec flow<br>2- Tetric flow<br>5- TETRIC<br>1- Surefil flow<br>7- Filtec P 90<br>4- Esthetic X<br>6- Filtec Z 350<br>Sig. | 10<br>10<br>10<br>10<br>10<br>10<br>10<br>1,000 | 53,712<br><br><br><br><br><br><br>1,000 | <br>55,599<br><br><br><br><br><br>1,000 | <br><br>64,130<br><br><br><br><br><br>1,000 | <br><br><br>72,725<br>73,704<br><br><br><br><br>,573 |
| Gabriel <sup>a</sup>              | 3- Filtec flow<br>2- Tetric flow<br>5- TETRIC<br>1- Surefil flow<br>7- Filtec P 90<br>4- Esthetic X<br>6- Filtec Z 350<br>Sig. | 10<br>10<br>10<br>10<br>10<br>10<br>10<br>1,000 | 53,712<br><br><br><br><br><br><br>1,000 | <br>55,599<br><br><br><br><br><br>1,000 | <br><br>64,130<br><br><br><br><br><br>1,000 | <br><br><br>72,725<br>73,704<br><br><br><br><br>,470 |

Means for groups in homogeneous subsets are displayed.

Durezza\_Top

| Material                        | N  | Subset for alpha = .05 |        |        |        |
|---------------------------------|----|------------------------|--------|--------|--------|
|                                 |    | 1                      | 2      | 3      | 4      |
| Ryan-Einot-Gabriel-Welsch F     | 10 | 53,712                 |        |        |        |
| 3- Filtec flow                  | 10 |                        |        |        |        |
| 2- Tetric flow                  | 10 |                        | 55,599 |        |        |
| 5- TETRIC                       | 10 |                        |        | 64,130 |        |
| 1- Surefil flow                 | 10 |                        |        |        | 72,725 |
| 7- Filtec P 90                  | 10 |                        |        |        | 73,704 |
| 4- Esthetic X                   | 10 |                        |        |        |        |
| 6- Filtec Z 350                 | 10 |                        |        |        |        |
| Sig.                            |    | 1,000                  | 1,000  | 1,000  | ,108   |
| Ryan-Einot-Gabriel-Welsch Range | 10 | 53,712                 |        |        |        |
| 3- Filtec flow                  | 10 |                        |        |        |        |
| 2- Tetric flow                  | 10 |                        | 55,599 |        |        |
| 5- TETRIC                       | 10 |                        |        | 64,130 |        |
| 1- Surefil flow                 | 10 |                        |        |        | 72,725 |
| 7- Filtec P 90                  | 10 |                        |        |        | 73,704 |
| 4- Esthetic X                   | 10 |                        |        |        |        |
| 6- Filtec Z 350                 | 10 |                        |        |        |        |
| Sig.                            |    | 1,000                  | 1,000  | 1,000  | ,108   |
| Hochberg <sup>a</sup>           | 10 | 53,712                 |        |        |        |
| 3- Filtec flow                  | 10 |                        |        |        |        |
| 2- Tetric flow                  | 10 |                        | 55,599 |        |        |
| 5- TETRIC                       | 10 |                        |        | 64,130 |        |
| 1- Surefil flow                 | 10 |                        |        |        | 72,725 |
| 7- Filtec P 90                  | 10 |                        |        |        | 73,704 |
| 4- Esthetic X                   | 10 |                        |        |        |        |
| 6- Filtec Z 350                 | 10 |                        |        |        |        |
| Sig.                            |    | 1,000                  | 1,000  | 1,000  | ,470   |

Means for groups in homogeneous subsets are displayed.

Dureza\_Top

|                                   |                                                                                                                                | Subset for alpha = .05                   |                                         |                                             |
|-----------------------------------|--------------------------------------------------------------------------------------------------------------------------------|------------------------------------------|-----------------------------------------|---------------------------------------------|
|                                   |                                                                                                                                | 5                                        | 6                                       | 7                                           |
| Student-Newman-Keuls <sup>a</sup> | 3- Filtec flow<br>2- Tetric flow<br>5- TETRIC<br>1- Surefil flow<br>7- Filtec P 90<br>4- Esthetic X<br>6- Filtec Z 350<br>Sig. | 73,704<br><br><br><br><br><br>1,000      | <br><br><br><br>77,422<br><br>1,000     | <br><br><br><br><br><br><br>78,664<br>1,000 |
| Tukey HSD <sup>a</sup>            | 3- Filtec flow<br>2- Tetric flow<br>5- TETRIC<br>1- Surefil flow<br>7- Filtec P 90<br>4- Esthetic X<br>6- Filtec Z 350<br>Sig. | <br><br><br><br>77,422<br>78,664<br>,096 | <br><br><br><br><br><br><br>            | <br><br><br><br><br><br><br>                |
| Tukey B <sup>a</sup>              | 3- Filtec flow<br>2- Tetric flow<br>5- TETRIC<br>1- Surefil flow<br>7- Filtec P 90<br>4- Esthetic X<br>6- Filtec Z 350         | <br><br><br><br>77,422<br><br>           | <br><br><br><br><br>78,664              | <br><br><br><br><br><br>                    |
| Duncan <sup>a</sup>               | 3- Filtec flow<br>2- Tetric flow<br>5- TETRIC<br>1- Surefil flow<br>7- Filtec P 90<br>4- Esthetic X<br>6- Filtec Z 350<br>Sig. | <br><br><br><br>73,704<br><br><br>1,000  | <br><br><br><br><br>77,422<br><br>1,000 | <br><br><br><br><br><br><br>78,664<br>1,000 |
| Scheffe <sup>a</sup>              | 3- Filtec flow<br>2- Tetric flow<br>5- TETRIC<br>1- Surefil flow<br>7- Filtec P 90<br>4- Esthetic X<br>6- Filtec Z 350<br>Sig. | <br><br><br><br>77,422<br>78,664<br>,275 | <br><br><br><br><br><br><br>            | <br><br><br><br><br><br><br>                |
| Gabriel <sup>a</sup>              | 3- Filtec flow<br>2- Tetric flow<br>5- TETRIC<br>1- Surefil flow<br>7- Filtec P 90<br>4- Esthetic X<br>6- Filtec Z 350<br>Sig. | <br><br><br><br>77,422<br>78,664<br>,135 | <br><br><br><br><br><br><br>            | <br><br><br><br><br><br><br>                |

Means for groups in homogeneous subsets are displayed.

**Dureza\_Top**

|                                 |                                                                                                                                | Subset for alpha = .05                   |                                     |   |
|---------------------------------|--------------------------------------------------------------------------------------------------------------------------------|------------------------------------------|-------------------------------------|---|
|                                 |                                                                                                                                | 5                                        | 6                                   | 7 |
| Ryan-Einot-Gabriel-Welsch F     | 3- Filtec flow<br>2- Tetric flow<br>5- TETRIC<br>1- Surefil flow<br>7- Filtec P 90<br>4- Esthetic X<br>6- Filtec Z 350<br>Sig. | 77,422<br><br><br><br><br><br>1,000      | <br><br><br><br>78,664<br><br>1,000 |   |
| Ryan-Einot-Gabriel-Welsch Range | 3- Filtec flow<br>2- Tetric flow<br>5- TETRIC<br>1- Surefil flow<br>7- Filtec P 90<br>4- Esthetic X<br>6- Filtec Z 350<br>Sig. | 77,422<br><br><br><br><br><br>1,000      | <br><br><br><br>78,664<br><br>1,000 |   |
| Hochberg <sup>a</sup>           | 3- Filtec flow<br>2- Tetric flow<br>5- TETRIC<br>1- Surefil flow<br>7- Filtec P 90<br>4- Esthetic X<br>6- Filtec Z 350<br>Sig. | 77,422<br>78,664<br><br><br><br><br>,135 |                                     |   |

Means for groups in homogeneous subsets are displayed.

a. Uses Harmonic Mean Sample Size = 10,000.

b. Critical values are not monotonic for these data. Substitutions have been made to ensure monotonicity. Type I error is therefore smaller.

**Prof\_Polim**

|                                   |                                                                                                                                | N                                      | Subset for alpha = .05                                   |                                                  |                                                      |                                         |
|-----------------------------------|--------------------------------------------------------------------------------------------------------------------------------|----------------------------------------|----------------------------------------------------------|--------------------------------------------------|------------------------------------------------------|-----------------------------------------|
|                                   |                                                                                                                                |                                        | 1                                                        | 2                                                | 3                                                    | 4                                       |
| Student-Newman-Keuls <sup>a</sup> | 5- TETRIC<br>6- Filtec Z 350<br>4- Esthetic X<br>7- Filtec P 90<br>3- Filtec flow<br>2- Tetric flow<br>1- Surefil flow<br>Sig. | 10<br>10<br>10<br>10<br>10<br>10<br>10 | 2,5440<br>2,5670<br>2,6120<br>2,6790<br><br><br><br>,080 | <br><br><br><br>2,8370<br>2,8930<br><br><br>,315 | <br><br><br><br><br><br>3,0710<br>1,000              |                                         |
| Tukey HSD <sup>a</sup>            | 5- TETRIC<br>6- Filtec Z 350<br>4- Esthetic X<br>7- Filtec P 90<br>3- Filtec flow<br>2- Tetric flow<br>1- Surefil flow<br>Sig. | 10<br>10<br>10<br>10<br>10<br>10<br>10 | 2,5440<br>2,5670<br>2,6120<br>2,6790<br><br><br><br>,200 | <br><br><br>2,6790<br>2,8370<br><br><br><br>,080 | <br><br><br><br>2,8370<br>2,8930<br><br><br><br>,949 | <br><br><br><br><br><br>3,0710<br>1,000 |

Means for groups in homogeneous subsets are displayed.



Prof\_Polim

|                                 | Material        | N  | Subset for alpha = .05 |        |        |        |
|---------------------------------|-----------------|----|------------------------|--------|--------|--------|
|                                 |                 |    | 1                      | 2      | 3      | 4      |
| Tukey B <sup>a</sup>            | 5- TETRIC       | 10 | 2,5440                 |        |        |        |
|                                 | 6- Filtec Z 350 | 10 | 2,5670                 |        |        |        |
|                                 | 4- Esthetic X   | 10 | 2,6120                 |        |        |        |
|                                 | 7- Filtec P 90  | 10 | 2,6790                 |        |        |        |
|                                 | 3- Filtec flow  | 10 |                        | 2,8370 |        |        |
|                                 | 2- Tetric flow  | 10 |                        | 2,8930 |        |        |
|                                 | 1- Surefil flow | 10 |                        |        | 3,0710 |        |
|                                 |                 |    |                        |        |        |        |
| Duncan <sup>a</sup>             | 5- TETRIC       | 10 | 2,5440                 |        |        |        |
|                                 | 6- Filtec Z 350 | 10 | 2,5670                 | 2,5670 |        |        |
|                                 | 4- Esthetic X   | 10 | 2,6120                 | 2,6120 |        |        |
|                                 | 7- Filtec P 90  | 10 |                        | 2,6790 |        |        |
|                                 | 3- Filtec flow  | 10 |                        |        | 2,8370 |        |
|                                 | 2- Tetric flow  | 10 |                        |        | 2,8930 |        |
|                                 | 1- Surefil flow | 10 |                        |        |        | 3,0710 |
|                                 | Sig.            |    | ,252                   | ,059   | ,315   | 1,000  |
| Scheffe <sup>a</sup>            | 5- TETRIC       | 10 | 2,5440                 |        |        |        |
|                                 | 6- Filtec Z 350 | 10 | 2,5670                 |        |        |        |
|                                 | 4- Esthetic X   | 10 | 2,6120                 |        |        |        |
|                                 | 7- Filtec P 90  | 10 | 2,6790                 | 2,6790 |        |        |
|                                 | 3- Filtec flow  | 10 |                        | 2,8370 | 2,8370 |        |
|                                 | 2- Tetric flow  | 10 |                        |        | 2,8930 | 2,8930 |
|                                 | 1- Surefil flow | 10 |                        |        |        | 3,0710 |
|                                 | Sig.            |    | ,439                   | ,245   | ,984   | ,130   |
| Gabriel <sup>a</sup>            | 5- TETRIC       | 10 | 2,5440                 |        |        |        |
|                                 | 6- Filtec Z 350 | 10 | 2,5670                 |        |        |        |
|                                 | 4- Esthetic X   | 10 | 2,6120                 |        |        |        |
|                                 | 7- Filtec P 90  | 10 | 2,6790                 | 2,6790 |        |        |
|                                 | 3- Filtec flow  | 10 |                        | 2,8370 | 2,8370 |        |
|                                 | 2- Tetric flow  | 10 |                        |        | 2,8930 |        |
|                                 | 1- Surefil flow | 10 |                        |        |        | 3,0710 |
|                                 | Sig.            |    | ,295                   | ,111   | ,999   | 1,000  |
| Ryan-Einot-Gabriel-Welsch F     | 5- TETRIC       | 10 | 2,5440                 |        |        |        |
|                                 | 6- Filtec Z 350 | 10 | 2,5670                 |        |        |        |
|                                 | 4- Esthetic X   | 10 | 2,6120                 |        |        |        |
|                                 | 7- Filtec P 90  | 10 | 2,6790                 |        |        |        |
|                                 | 3- Filtec flow  | 10 |                        | 2,8370 |        |        |
|                                 | 2- Tetric flow  | 10 |                        | 2,8930 |        |        |
|                                 | 1- Surefil flow | 10 |                        |        | 3,0710 |        |
|                                 | Sig.            |    | ,144                   | ,735   | 1,000  |        |
| Ryan-Einot-Gabriel-Welsch Range | 5- TETRIC       | 10 | 2,5440                 |        |        |        |
|                                 | 6- Filtec Z 350 | 10 | 2,5670                 |        |        |        |
|                                 | 4- Esthetic X   | 10 | 2,6120                 |        |        |        |
|                                 | 7- Filtec P 90  | 10 | 2,6790                 |        |        |        |
|                                 | 3- Filtec flow  | 10 |                        | 2,8370 |        |        |
|                                 | 2- Tetric flow  | 10 |                        | 2,8930 |        |        |
|                                 | 1- Surefil flow | 10 |                        |        | 3,0710 |        |
|                                 | Sig.            |    | ,136                   | ,735   | 1,000  |        |

Means for groups in homogeneous subsets are displayed.

**Prof\_Polim**

|                       | Material        | N  | Subset for alpha = .05 |        |        |        |
|-----------------------|-----------------|----|------------------------|--------|--------|--------|
|                       |                 |    | 1                      | 2      | 3      | 4      |
| Hochberg <sup>a</sup> | 5- TETRIC       | 10 | 2,5440                 |        |        |        |
|                       | 6- Filtec Z 350 | 10 | 2,5670                 |        |        |        |
|                       | 4- Esthetic X   | 10 | 2,6120                 |        |        |        |
|                       | 7- Filtec P 90  | 10 | 2,6790                 | 2,6790 |        |        |
|                       | 3- Filtec flow  | 10 |                        | 2,8370 | 2,8370 |        |
|                       | 2- Tetric flow  | 10 |                        |        | 2,8930 |        |
|                       | 1- Surefil flow | 10 |                        |        |        | 3,0710 |
|                       | Sig.            |    | ,295                   | ,111   | ,999   | 1,000  |

Means for groups in homogeneous subsets are displayed.

a. Uses Harmonic Mean Sample Size = 10,000.

b. Critical values are not monotonic for these data. Substitutions have been made to ensure monotonicity. Type I error is therefore smaller.

**Oneway**

**Descriptives**

Red\_Cont\_com

|                 | N  | Mean   | Std. Deviation | Std. Error | 95% Confidence Interval for Mean |             |
|-----------------|----|--------|----------------|------------|----------------------------------|-------------|
|                 |    |        |                |            | Lower Bound                      | Upper Bound |
| 4- Esthetic X   | 10 | 6,2870 | ,12193         | ,03856     | 6,1998                           | 6,3742      |
| 5- TETRIC       | 10 | 5,8940 | ,23726         | ,07503     | 5,7243                           | 6,0637      |
| 6- Filtec Z 350 | 10 | 5,7400 | ,35978         | ,11377     | 5,4826                           | 5,9974      |
| 7- Filtec P 90  | 10 | 3,8060 | ,24254         | ,07670     | 3,6325                           | 3,9795      |
| Total           | 40 | 5,4318 | 1,00214        | ,15845     | 5,1113                           | 5,7522      |

**Descriptives**

Red\_Cont\_com

|                 | Minimum | Maximum |
|-----------------|---------|---------|
| 4- Esthetic X   | 6,01    | 6,47    |
| 5- TETRIC       | 5,60    | 6,28    |
| 6- Filtec Z 350 | 5,27    | 6,41    |
| 7- Filtec P 90  | 3,32    | 4,32    |
| Total           | 3,32    | 6,47    |

**ANOVA**

Red\_Cont\_com

|                | Sum of Squares | df | Mean Square | F       | Sig. |
|----------------|----------------|----|-------------|---------|------|
| Between Groups | 36,832         | 3  | 12,277      | 189,296 | ,000 |
| Within Groups  | 2,335          | 36 | ,065        |         |      |
| Total          | 39,167         | 39 |             |         |      |

**Post Hoc Tests**

**Homogeneous Subsets**

Red\_Cont\_com

| Material                          | N               | Subset for alpha = .05 |        |        |        |
|-----------------------------------|-----------------|------------------------|--------|--------|--------|
|                                   |                 | 1                      | 2      | 3      |        |
| Student-Newman-Keuls <sup>a</sup> | 7- Filtec P 90  | 10                     | 3,8060 |        |        |
|                                   | 6- Filtec Z 350 | 10                     |        | 5,7400 |        |
|                                   | 5- TETRIC       | 10                     |        | 5,8940 |        |
|                                   | 4- Esthetic X   | 10                     |        |        | 6,2870 |
|                                   | Sig.            |                        | 1,000  | ,185   | 1,000  |
| Tukey HSD <sup>a</sup>            | 7- Filtec P 90  | 10                     | 3,8060 |        |        |
|                                   | 6- Filtec Z 350 | 10                     |        | 5,7400 |        |
|                                   | 5- TETRIC       | 10                     |        | 5,8940 |        |
|                                   | 4- Esthetic X   | 10                     |        |        | 6,2870 |
|                                   | Sig.            |                        | 1,000  | ,537   | 1,000  |
| Tukey B <sup>a</sup>              | 7- Filtec P 90  | 10                     | 3,8060 |        |        |
|                                   | 6- Filtec Z 350 | 10                     |        | 5,7400 |        |
|                                   | 5- TETRIC       | 10                     |        | 5,8940 |        |
|                                   | 4- Esthetic X   | 10                     |        |        | 6,2870 |
| Duncan <sup>a</sup>               | 7- Filtec P 90  | 10                     | 3,8060 |        |        |
|                                   | 6- Filtec Z 350 | 10                     |        | 5,7400 |        |
|                                   | 5- TETRIC       | 10                     |        | 5,8940 |        |
|                                   | 4- Esthetic X   | 10                     |        |        | 6,2870 |
|                                   | Sig.            |                        | 1,000  | ,185   | 1,000  |
| Scheffe <sup>a</sup>              | 7- Filtec P 90  | 10                     | 3,8060 |        |        |
|                                   | 6- Filtec Z 350 | 10                     |        | 5,7400 |        |
|                                   | 5- TETRIC       | 10                     |        | 5,8940 |        |
|                                   | 4- Esthetic X   | 10                     |        |        | 6,2870 |
|                                   | Sig.            |                        | 1,000  | ,613   | 1,000  |
| Gabriel <sup>a</sup>              | 7- Filtec P 90  | 10                     | 3,8060 |        |        |
|                                   | 6- Filtec Z 350 | 10                     |        | 5,7400 |        |
|                                   | 5- TETRIC       | 10                     |        | 5,8940 |        |
|                                   | 4- Esthetic X   | 10                     |        |        | 6,2870 |
|                                   | Sig.            |                        | 1,000  | ,689   | 1,000  |
| Ryan-Einot-Gabriel-Welsch F       | 7- Filtec P 90  | 10                     | 3,8060 |        |        |
|                                   | 6- Filtec Z 350 | 10                     |        | 5,7400 |        |
|                                   | 5- TETRIC       | 10                     |        | 5,8940 |        |
|                                   | 4- Esthetic X   | 10                     |        |        | 6,2870 |
|                                   | Sig.            |                        | 1,000  | ,335   | 1,000  |
| Ryan-Einot-Gabriel-Welsch Range   | 7- Filtec P 90  | 10                     | 3,8060 |        |        |
|                                   | 6- Filtec Z 350 | 10                     |        | 5,7400 |        |
|                                   | 5- TETRIC       | 10                     |        | 5,8940 |        |
|                                   | 4- Esthetic X   | 10                     |        |        | 6,2870 |
|                                   | Sig.            |                        | 1,000  | ,335   | 1,000  |
| Hochberg <sup>a</sup>             | 7- Filtec P 90  | 10                     | 3,8060 |        |        |
|                                   | 6- Filtec Z 350 | 10                     |        | 5,7400 |        |
|                                   | 5- TETRIC       | 10                     |        | 5,8940 |        |
|                                   | 4- Esthetic X   | 10                     |        |        | 6,2870 |
|                                   | Sig.            |                        | 1,000  | ,689   | 1,000  |

Means for groups in homogeneous subsets are displayed.

a. Uses Harmonic Mean Sample Size = 10,000.

b. Critical values are not monotonic for these data. Substitutions have been made to ensure monotonicity. Type I error is therefore smaller.

Oneway

### Descriptives

Red\_Cont\_sem

|                 | N  | Mean   | Std. Deviation | Std. Error | 95% Confidence Interval for Mean |             |
|-----------------|----|--------|----------------|------------|----------------------------------|-------------|
|                 |    |        |                |            | Lower Bound                      | Upper Bound |
| 1- Surefil flow | 10 | 5,0590 | ,36892         | ,11666     | 4,7951                           | 5,3229      |
| 4- Esthetic X   | 10 | 8,5210 | ,39051         | ,12349     | 8,2416                           | 8,8004      |
| 5- TETRIC       | 10 | 8,4950 | ,49437         | ,15633     | 8,1413                           | 8,8487      |
| 6- Filtec Z 350 | 10 | 8,4070 | ,46636         | ,14748     | 8,0734                           | 8,7406      |
| 7- Filtec P 90  | 10 | 4,8730 | ,37665         | ,11911     | 4,6036                           | 5,1424      |
| Total           | 50 | 7,0710 | 1,78415        | ,25232     | 6,5640                           | 7,5780      |

### Descriptives

Red\_Cont\_sem

|                 | Minimum | Maximum |
|-----------------|---------|---------|
| 1- Surefil flow | 4,55    | 5,54    |
| 4- Esthetic X   | 7,84    | 9,38    |
| 5- TETRIC       | 7,70    | 9,38    |
| 6- Filtec Z 350 | 7,48    | 9,16    |
| 7- Filtec P 90  | 4,14    | 5,66    |
| Total           | 4,14    | 9,38    |

### ANOVA

Red\_Cont\_sem

|                | Sum of Squares | df | Mean Square | F       | Sig. |
|----------------|----------------|----|-------------|---------|------|
| Between Groups | 147,945        | 4  | 36,986      | 207,238 | ,000 |
| Within Groups  | 8,031          | 45 | ,178        |         |      |
| Total          | 155,976        | 49 |             |         |      |

## Post Hoc Tests

### Homogeneous Subsets

Red\_Cont\_sem

|                                   | Material        | N  | Subset for alpha = .05 |        |
|-----------------------------------|-----------------|----|------------------------|--------|
|                                   |                 |    | 1                      | 2      |
| Student-Newman-Keuls <sup>a</sup> | 7- Filtec P 90  | 10 | 4,8730                 |        |
|                                   | 1- Surefil flow | 10 | 5,0590                 |        |
|                                   | 6- Filtec Z 350 | 10 |                        | 8,4070 |
|                                   | 5- TETRIC       | 10 |                        | 8,4950 |
|                                   | 4- Esthetic X   | 10 |                        | 8,5210 |
|                                   | Sig.            |    |                        | ,330   |
| Tukey HSD <sup>a</sup>            | 7- Filtec P 90  | 10 | 4,8730                 |        |
|                                   | 1- Surefil flow | 10 | 5,0590                 |        |
|                                   | 6- Filtec Z 350 | 10 |                        | 8,4070 |
|                                   | 5- TETRIC       | 10 |                        | 8,4950 |
|                                   | 4- Esthetic X   | 10 |                        | 8,5210 |
|                                   | Sig.            |    |                        | ,861   |

Means for groups in homogeneous subsets are displayed.

Red\_Cont\_sem

|                                 | Material        | N  | Subset for alpha = .05 |        |
|---------------------------------|-----------------|----|------------------------|--------|
|                                 |                 |    | 1                      | 2      |
| Tukey B <sup>a</sup>            | 7- Filtec P 90  | 10 | 4,8730                 |        |
|                                 | 1- Surefil flow | 10 | 5,0590                 |        |
|                                 | 6- Filtec Z 350 | 10 |                        | 8,4070 |
|                                 | 5- TETRIC       | 10 |                        | 8,4950 |
|                                 | 4- Esthetic X   | 10 |                        | 8,5210 |
| Duncan <sup>a</sup>             | 7- Filtec P 90  | 10 | 4,8730                 |        |
|                                 | 1- Surefil flow | 10 | 5,0590                 |        |
|                                 | 6- Filtec Z 350 | 10 |                        | 8,4070 |
|                                 | 5- TETRIC       | 10 |                        | 8,4950 |
|                                 | 4- Esthetic X   | 10 |                        | 8,5210 |
|                                 | Sig.            |    | ,330                   | ,575   |
| Scheffe <sup>a</sup>            | 7- Filtec P 90  | 10 | 4,8730                 |        |
|                                 | 1- Surefil flow | 10 | 5,0590                 |        |
|                                 | 6- Filtec Z 350 | 10 |                        | 8,4070 |
|                                 | 5- TETRIC       | 10 |                        | 8,4950 |
|                                 | 4- Esthetic X   | 10 |                        | 8,5210 |
|                                 | Sig.            |    | ,913                   | ,985   |
| Gabriel <sup>a</sup>            | 7- Filtec P 90  | 10 | 4,8730                 |        |
|                                 | 1- Surefil flow | 10 | 5,0590                 |        |
|                                 | 6- Filtec Z 350 | 10 |                        | 8,4070 |
|                                 | 5- TETRIC       | 10 |                        | 8,4950 |
|                                 | 4- Esthetic X   | 10 |                        | 8,5210 |
|                                 | Sig.            |    | ,977                   | 1,000  |
| Ryan-Einot-Gabriel-Welsch F     | 7- Filtec P 90  | 10 | 4,8730                 |        |
|                                 | 1- Surefil flow | 10 | 5,0590                 |        |
|                                 | 6- Filtec Z 350 | 10 |                        | 8,4070 |
|                                 | 5- TETRIC       | 10 |                        | 8,4950 |
|                                 | 4- Esthetic X   | 10 |                        | 8,5210 |
|                                 | Sig.            |    | ,633                   | ,942   |
| Ryan-Einot-Gabriel-Welsch Range | 7- Filtec P 90  | 10 | 4,8730                 |        |
|                                 | 1- Surefil flow | 10 | 5,0590                 |        |
|                                 | 6- Filtec Z 350 | 10 |                        | 8,4070 |
|                                 | 5- TETRIC       | 10 |                        | 8,4950 |
|                                 | 4- Esthetic X   | 10 |                        | 8,5210 |
|                                 | Sig.            |    | ,633                   | ,942   |
| Hochberg <sup>a</sup>           | 7- Filtec P 90  | 10 | 4,8730                 |        |
|                                 | 1- Surefil flow | 10 | 5,0590                 |        |
|                                 | 6- Filtec Z 350 | 10 |                        | 8,4070 |
|                                 | 5- TETRIC       | 10 |                        | 8,4950 |
|                                 | 4- Esthetic X   | 10 |                        | 8,5210 |
|                                 | Sig.            |    | ,977                   | 1,000  |

Means for groups in homogeneous subsets are displayed.

a. Uses Harmonic Mean Sample Size = 10,000.

b. Critical values are not monotonic for these data. Substitutions have been made to ensure monotonicity. Type I error is therefore smaller.
